# Supplementary material for: Biocompatible and biodegradable fluorescent microfibers physiologically secreted by live cells upon spontaneous uptake of thiophene fluorophore
Source: Royal Society of Chemistry journal article supplement (doi:10.1039/c4tb01562b), 2014-10-22
Supplement: c4tb01562b4.pdf [file c4tb01562b4.pdf]

## SUPPORTING INFORMATION

For

### **Biocompatible and biodegradable fluorescent microfibers physiologically secreted by live cells upon spontaneous uptake of thiophene fluorophore**

Ilaria E. Palamà,<sup>a\*</sup> Francesca Di Maria,<sup>b,c</sup> Stefania D'Amone,<sup>a</sup> Giovanna Barbarella<sup>c,d</sup> and Giuseppe Gigli<sup>a,b,e</sup>

<sup>a</sup>*Institute Nanoscience CNR (NNL, CNR-NANO) via Arnesano, Lecce, Italy;*

<sup>b</sup>*Dept. Matematica e Fisica 'Ennio De Giorgi', via Monteroni, University of Salento; Consiglio Nazionale Ricerche (CNR-ISOF)<sup>c</sup> and <sup>d</sup>Mediteknology srl, Via P. Gobetti 101, Bologna, Italy;*

<sup>e</sup>*Italian Institute of Technology (IIT) -Center for Biomolecular Nanotechnologies, via Barsanti, Arnesano, Italy*

\*email: [ilariaelena.palama@nano.cnr.it](mailto:ilariaelena.palama@nano.cnr.it)

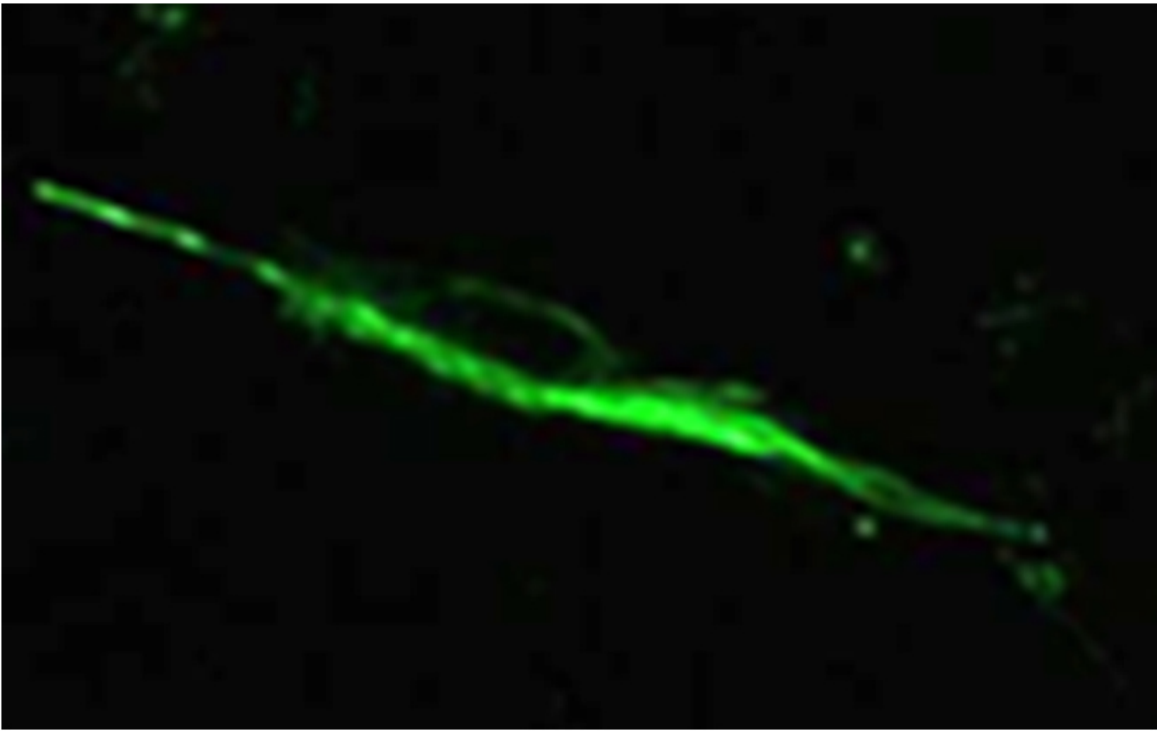

**Figure 1S.** A optical magnification detail of Figure 1D.

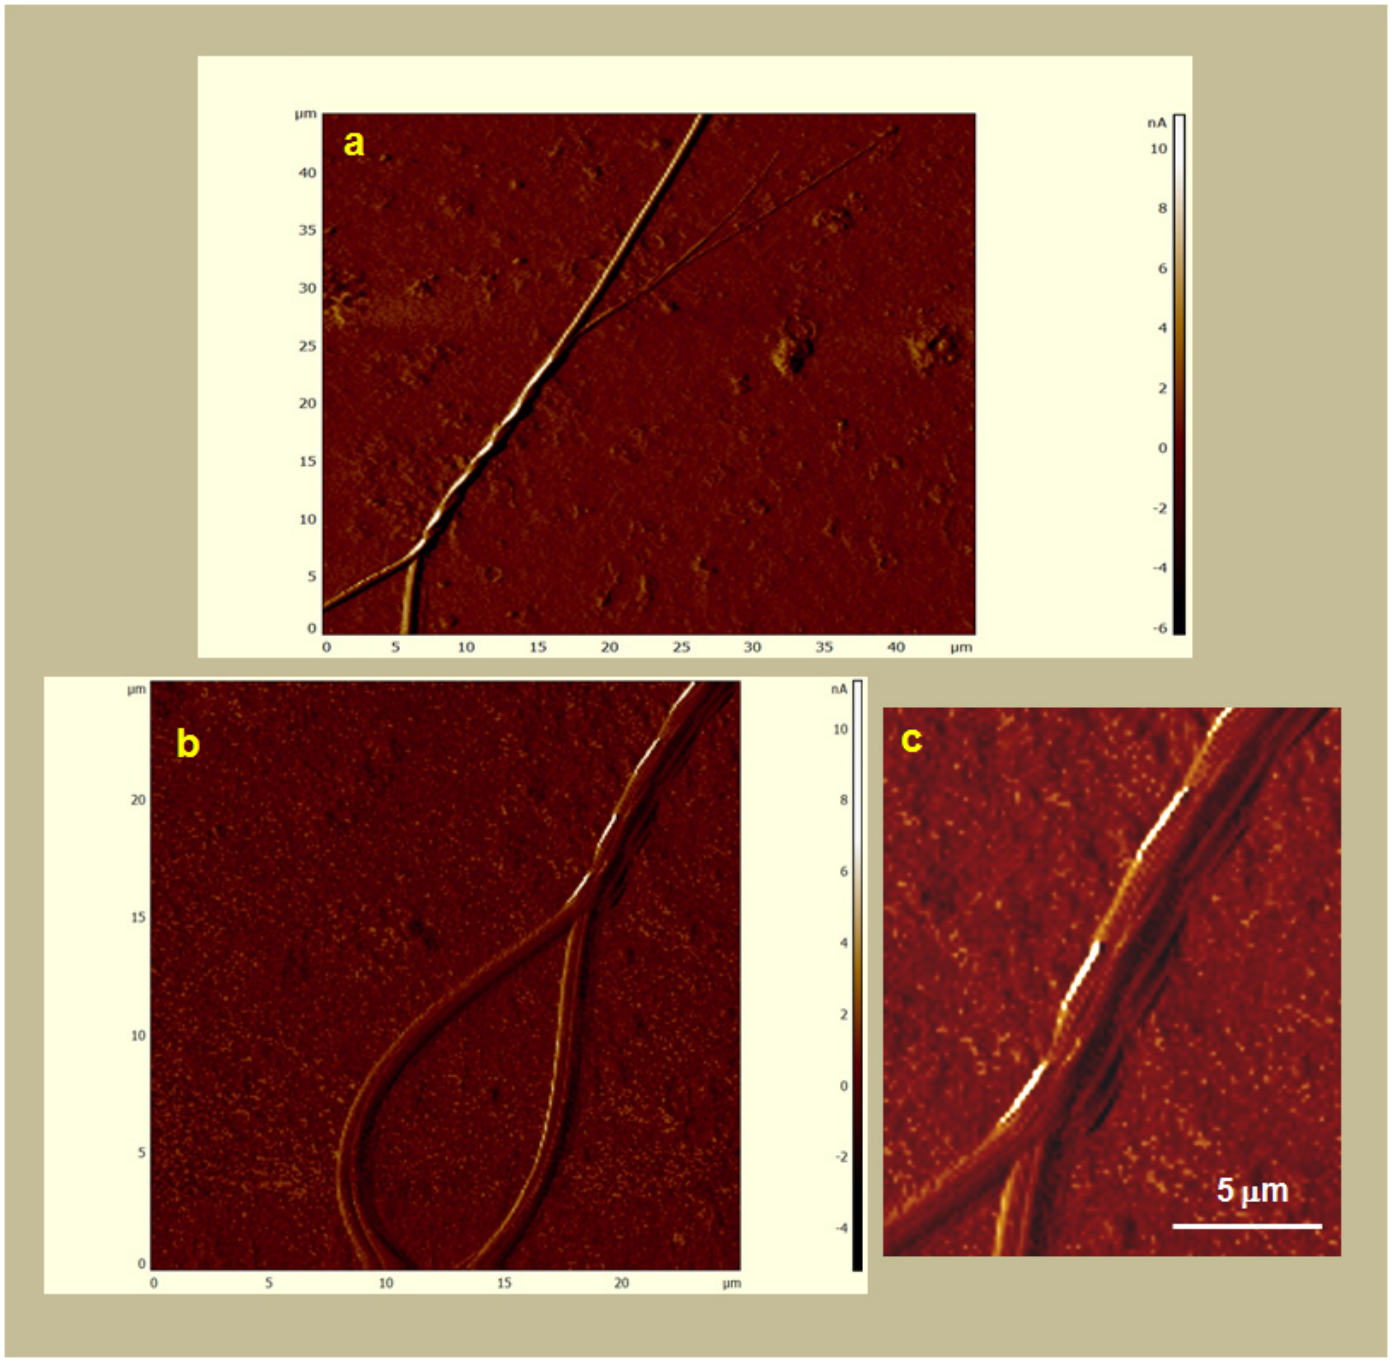

**Figure 2S.** a), b) AFM images of a fluorescent microfiber isolated from cell lysate. c) A detail of b).

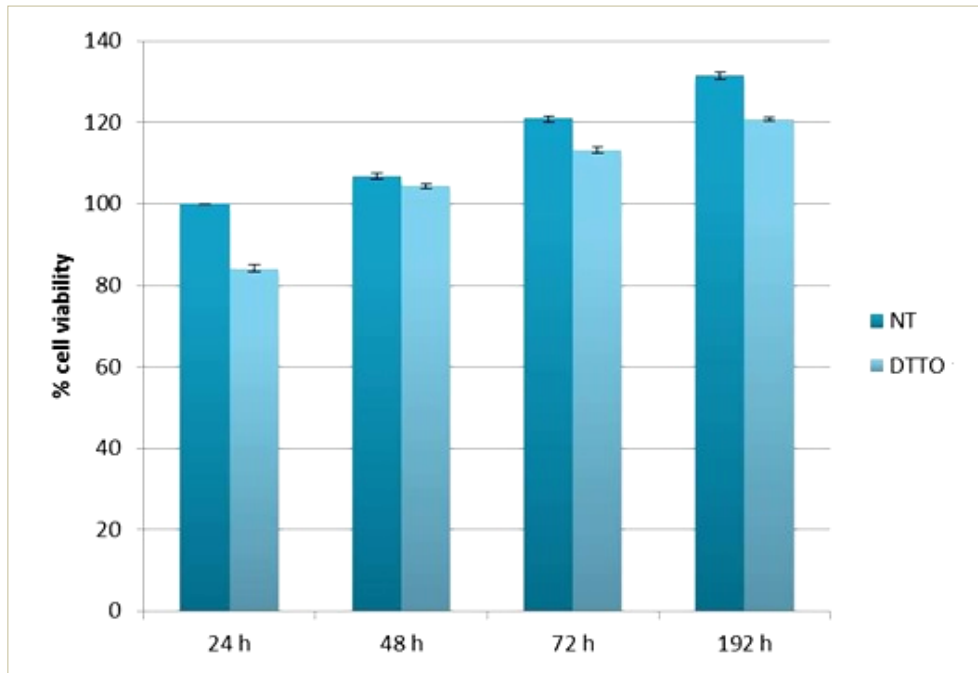

**Figure 3S.** MTT cytotoxicity tests on mouse neuroblastoma cells treated with DTTO dye compared to untreated cells (NT). Representative measurements of three distinct sets of data have been reported and no significant difference between values at different time points is observed at  $P < 0.05$  with *t-Student test*.
